# Supplementary material for: Efficient hydrogen production by saline water electrolysis at high current densities without the interfering chlorine evolution
Source: Royal Society of Chemistry journal article supplement (doi:10.1039/d1ta05703k), 2021-01-01
Supplement: d1ta05703k1.pdf [file d1ta05703k1.pdf]

Electronic Supplementary Material (ESI)  
This journal is © The Royal Society of Chemistry 2021

## **Efficient hydrogen production by saline water electrolysis at high current densities without the interfering chlorine evolution**

Zhipeng Yu,<sup>a,b</sup> Junyuan Xu,<sup>a,c</sup> Lijian Meng<sup>d</sup> and Lifeng Liu<sup>a,\*</sup>

<sup>a</sup> International Iberian Nanotechnology Laboratory (INL), Avenida Mestre Jose Veiga, 4715-330 Braga, Portugal

<sup>b</sup> Laboratory of Separation and Reaction Engineering – Laboratory of Catalysis and Materials (LSRE-LCM), Faculdade de Engenharia, Universidade do Porto, Rua Dr. Roberto Frias, 4200-465 Porto, Portugal

<sup>c</sup> Laboratory of Advanced Spectro-electrochemistry and Li-on Batteries, Dalian Institute of Chemical Physics, Chinese Academy of Sciences, 116023 Dalian, China

<sup>d</sup> Centre of Innovation in Engineering and Industrial Technology, Instituto Superior de Engenharia do Porto, Instituto Politécnico do Porto, Rua Dr. Antonio Bernardino de Almeida 431, 4249-015 Porto, Portugal

\* Corresponding author email. [lifeng.liu@inl.int](mailto:lifeng.liu@inl.int) (L. Liu)

## Experimental procedures

### Preparation of the Co-Ni-P/CP electrodes:

The carbon paper (CP, FuelCellStore) was firstly treated in a mixed solution of sulfuric acid and nitric acid (v (98% H<sub>2</sub>SO<sub>4</sub>):v (70% HNO<sub>3</sub>):v (H<sub>2</sub>O) = 1:1:1) at 60 °C for 6 h under vigorous magnetic stirring, in order to make the surface hydrophilic and to introduce the nucleation sites for the growth of cobalt-nickel-carbonate-hydroxide precursor NWs. The precursor solution was prepared by dissolving 10 mmol urea, 5 mmol NH<sub>4</sub>F, 2 mmol Co(NO<sub>3</sub>)<sub>2</sub>·6H<sub>2</sub>O and 2 mmol Ni(NO<sub>3</sub>)<sub>2</sub>·6H<sub>2</sub>O in 30 ml deionized (DI) water under continuous magnetic stirring until a homogeneous, transparent solution was obtained (typically for 30 min), according to a previous report.<sup>1</sup> Afterwards, the solution was transferred into a Teflon-lined stainless steel autoclave reactor, and a piece of acid-treated CP (4 × 3 cm<sup>2</sup>) was completely submerged in the precursor solution. Subsequently, the reactor was sealed and heated up to 120 °C, and maintained at this temperature for 6 h. After the autoclave reactor was cooled down to room temperature, the CP was taken out and thoroughly rinsed several times with DI water and then dried under vacuum at 70°C.

The Co-Ni-P/CP electrode was obtained by phosphorization of the precursor electrode using NaH<sub>2</sub>PO<sub>2</sub> as the source of phosphorus at 300°C. Specifically, the CP coated with precursor NWs was loaded in a ceramic boat and 1.0 g of NaH<sub>2</sub>PO<sub>2</sub> powders was placed 2 cm away from the CP at the upstream side. Subsequently, the furnace was purged with high-purity N<sub>2</sub> (99.999%) for 1 h to remove air, heated to 300 °C at a ramping rate of 5 °C min<sup>-1</sup> and held at this temperature for 2 h. Finally, the furnace was naturally cooled down to room temperature. The mass loading of Co-Ni-P NWs on the CP electrode is around 6 mg cm<sup>-2</sup>.

### **Materials Characterization:**

The morphology of Co-Ni-P/CP electrode was characterized by scanning electron microscopy (SEM, FEI Quanta 650 FEG microscope equipped with an INCA 350 spectrometer) and transmission electron microscopy (TEM, FEI ChemiSTEM 80-200, probe corrected). The X-ray diffraction (XRD) experiment was conducted on an X'Pert PRO diffractometer (PANalytical) set at 45 kV and 40 mA, using Cu  $K_{\alpha}$  radiation ( $\lambda = 1.541874 \text{ \AA}$ ) and a PIXcel detector. Data were collected with the Bragg–Brentano configuration in the  $2\theta$  range of  $20 - 80^{\circ}$  at a scan speed of  $0.011^{\circ} \text{ s}^{-1}$ . X-ray photoelectron spectroscopy (XPS) characterization was carried out on an ESCALAB 250Xi instrument with the monochromated Al  $K_{\alpha}$  (1486.6 eV) X-ray source.

### **Electrocatalytic tests:**

All electrochemical measurements of the Co-Ni-P/CP electrode was performed in a three-electrode configuration at room temperature using a Biologic VMP3 potentiostat/galvanostat. The as-synthesized Co-Ni-P/CP electrode, a saturated calomel electrode (SCE), and a graphite rod were employed as the working, reference, and counter electrodes, respectively. The SCE reference was calibrated before each measurement in the  $\text{H}_2$ -saturated 0.5 M  $\text{H}_2\text{SO}_4$  solution using a clean Pt wire as the working electrode. All potentials in this study were converted to the reversible hydrogen electrode (RHE) scale according to the following equation:

$$E_{\text{RHE}} = E_{\text{SCE}} + 0.059 \times \text{pH} + 0.244 \quad (\text{S1})$$

The HER, OER and HzOR measurements were carried out in the simulated seawater containing 1.0 M KOH + 0.5 M NaCl. For HzOR tests, different concentrations of hydrazine were dissolved in the electrolyte. The linear scan voltammetry (LSV) was performed at a scan rate of  $5 \text{ mV s}^{-1}$ . An  $iR$ -correction (85%) was applied to compensate

for the voltage drop between the reference and working electrodes, which was measured by the single-point high-frequency impedance test. The electrochemical impedance spectroscopy (EIS) measurements were conducted at  $-0.110$  V vs. RHE for the HER,  $-0.057$  V vs. RHE for the HzOR and  $1.550$  V for OER in the frequency range of  $10^5 - 0.01$  Hz with a  $10$  mV sinusoidal perturbation. The stability of the Co-Ni-P/CP electrode was assessed using chronopotentiometry (CP) at a constant current density of  $500 \text{ mA cm}^{-2}$  for the OER, HzOR, OSWE and HzOR + HER, and  $-500 \text{ mA cm}^{-2}$  for the HER. Moreover, the stability of the Co-Ni-P/CP pair toward HzOR + HER at  $1000 \text{ mA cm}^{-2}$  was also assessed.

Supplementary figures:

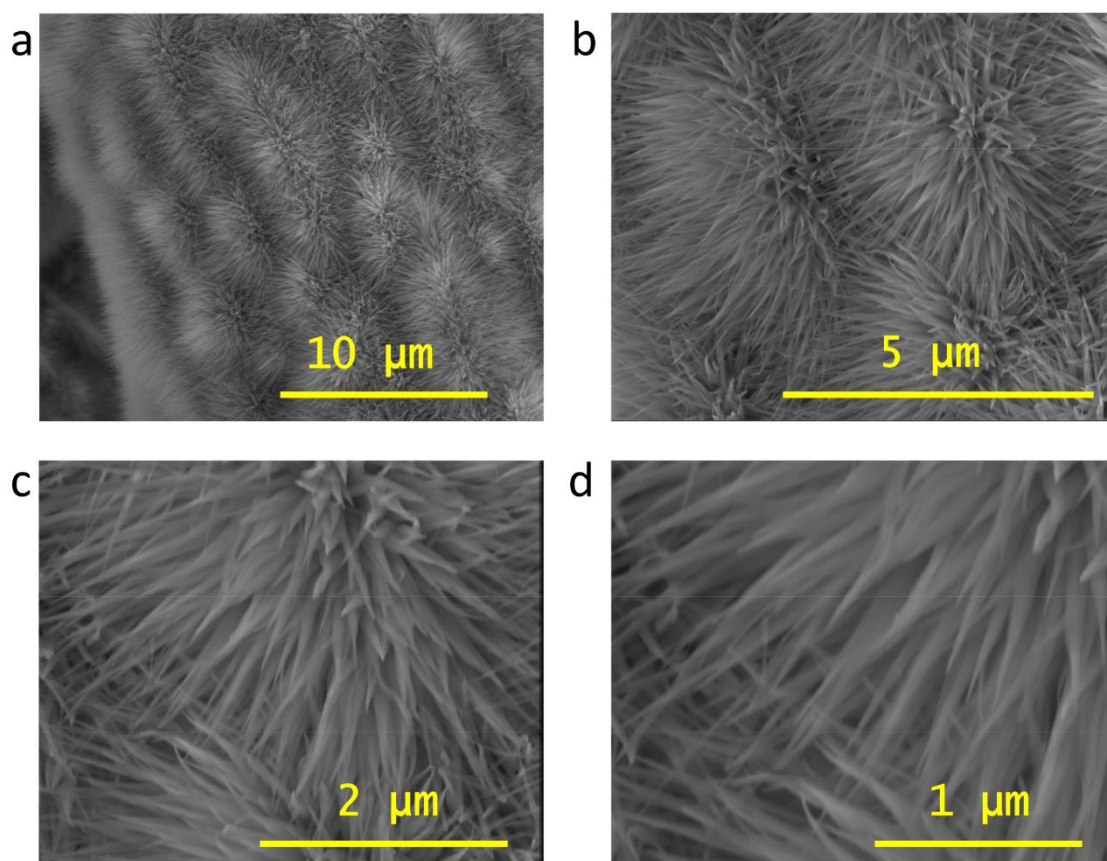

**Fig. S1** (a, b) Low-magnification and (c, d) high-magnification SEM images showing the morphology of the as-prepared cobalt-nickel-carbonate-hydroxide precursor ( $\text{CoNi}(\text{CO}_3)(\text{OH})_2$ ) nanowires on carbon paper.

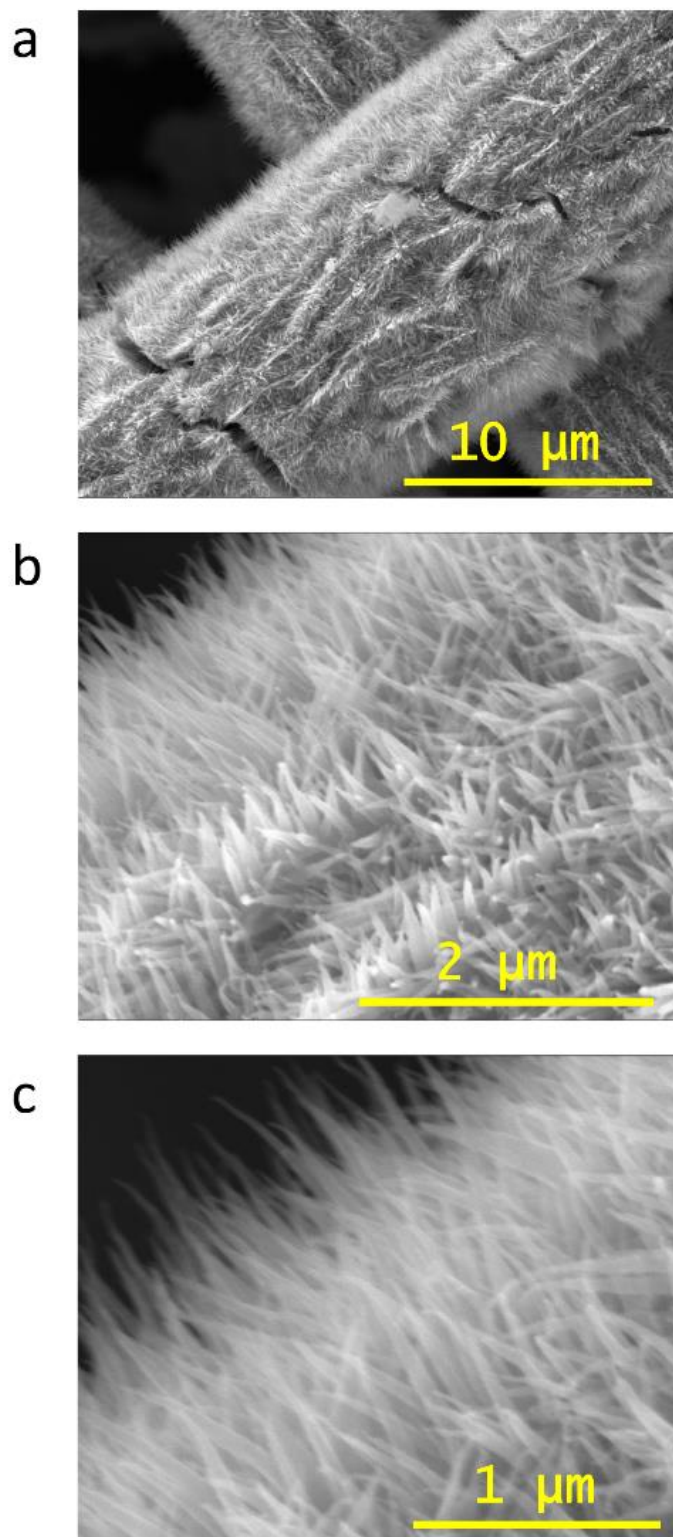

**Fig. S2** (a) Low- and (b, c) high-magnification SEM images showing the morphology of the as-prepared Co-Ni-P/CP electrode.

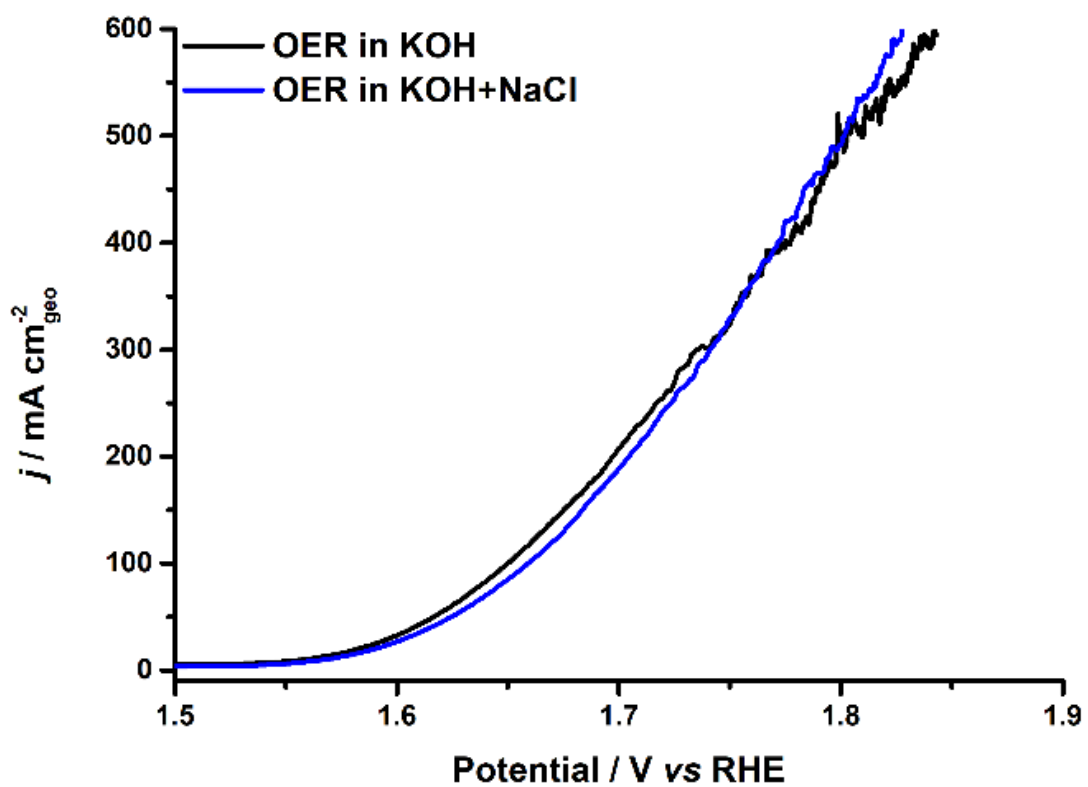

**Fig. S3** LSV curves showing the electrocatalytic activity of the Co-Ni-P/CP in 1.0 M KOH and 1.0 M KOH + 0.5 M NaCl solutions (zoomed view of **Fig. 3a** in the main text).

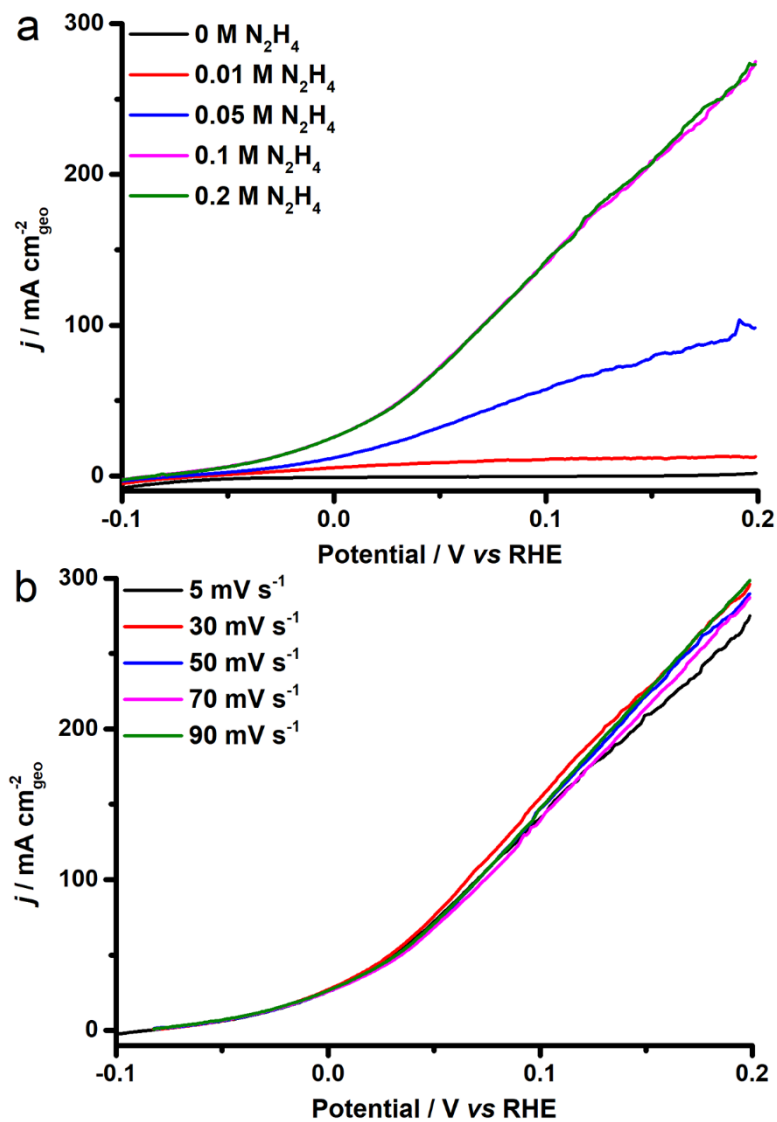

**Fig. S4** (a) LSV curves of the Co-Ni-P/CP electrode recorded in the  $1.0 \text{ M KOH} + 0.5 \text{ M NaCl}$  electrolytes with different concentrations of hydrazine. (b) LSV curves of the Co-Ni-P/CP electrode recorded in  $1.0 \text{ M KOH} + 0.5 \text{ M NaCl} + 0.1 \text{ M N}_2\text{H}_4$  at different scan rates.



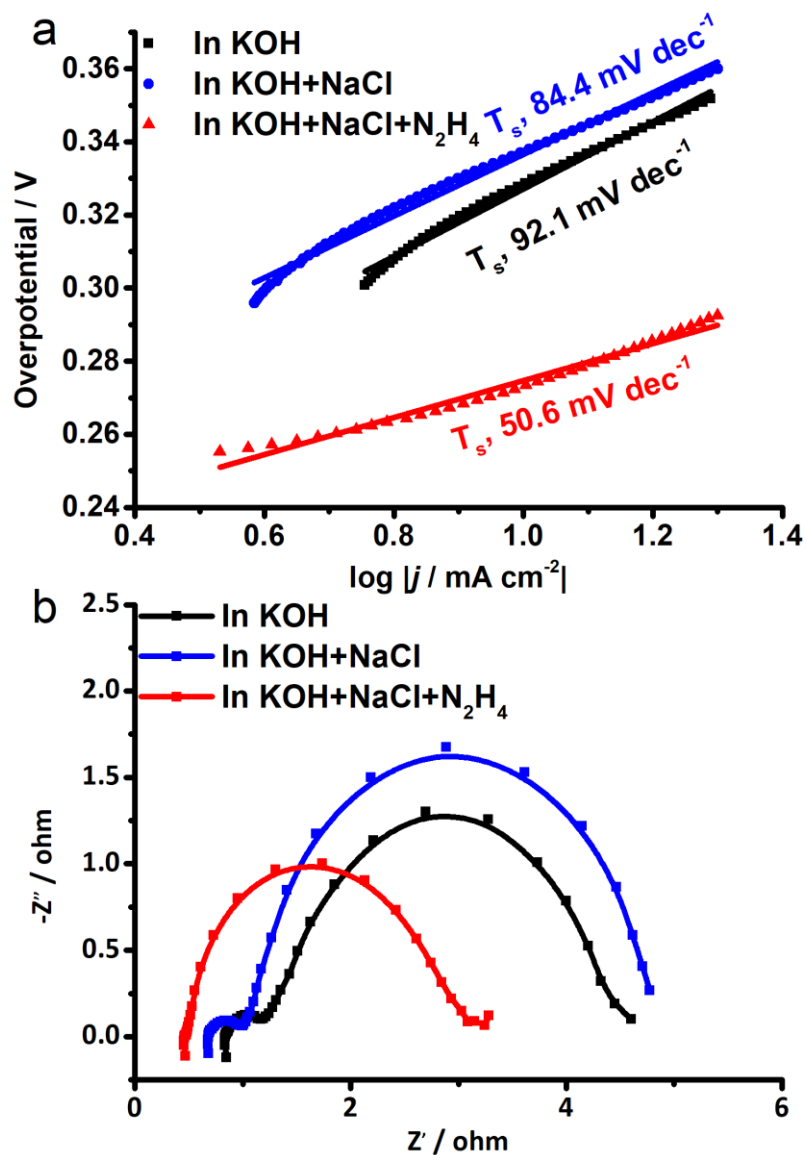

**Fig. S5** (a) Tafel plots and (b) Nyquist plots of the Co-Ni-P/CP electrode measured at  $-0.057 \text{ V}$  vs. RHE toward the HzOR and  $1.550 \text{ V}$  vs. RHE toward the OER.

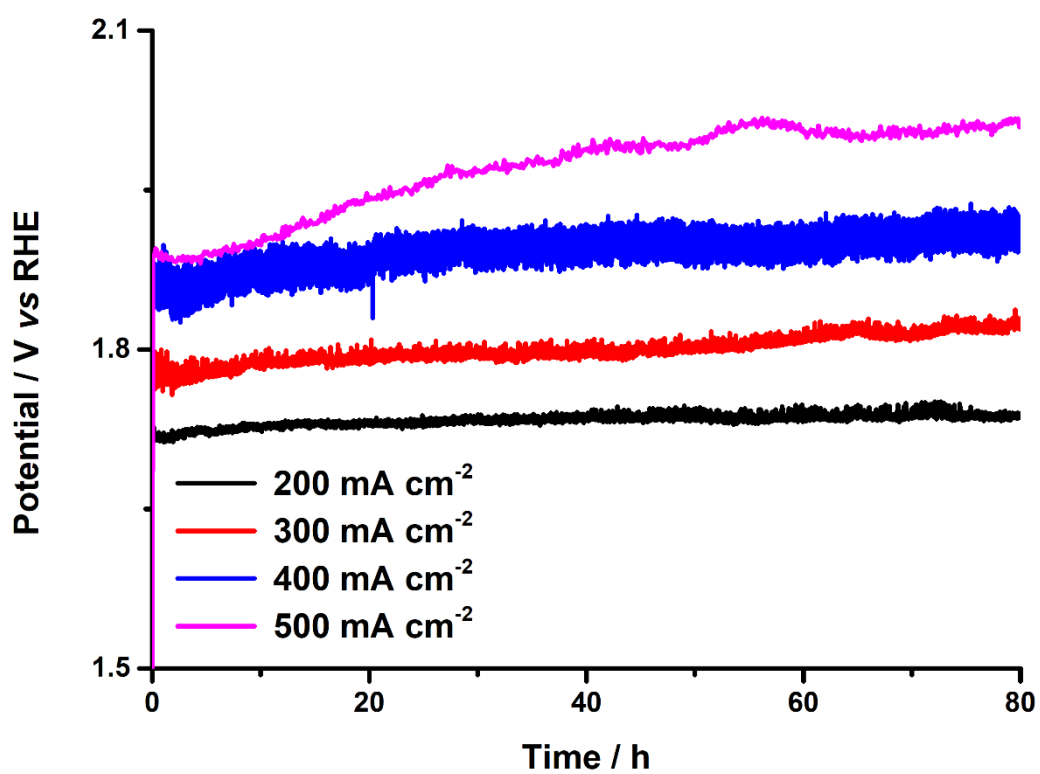

**Fig. S6** Chronopotentiometric curves of the Co-Ni-P/CP electrode recorded in 1.0 M KOH + 0.5 M NaCl electrolyte at different current densities.

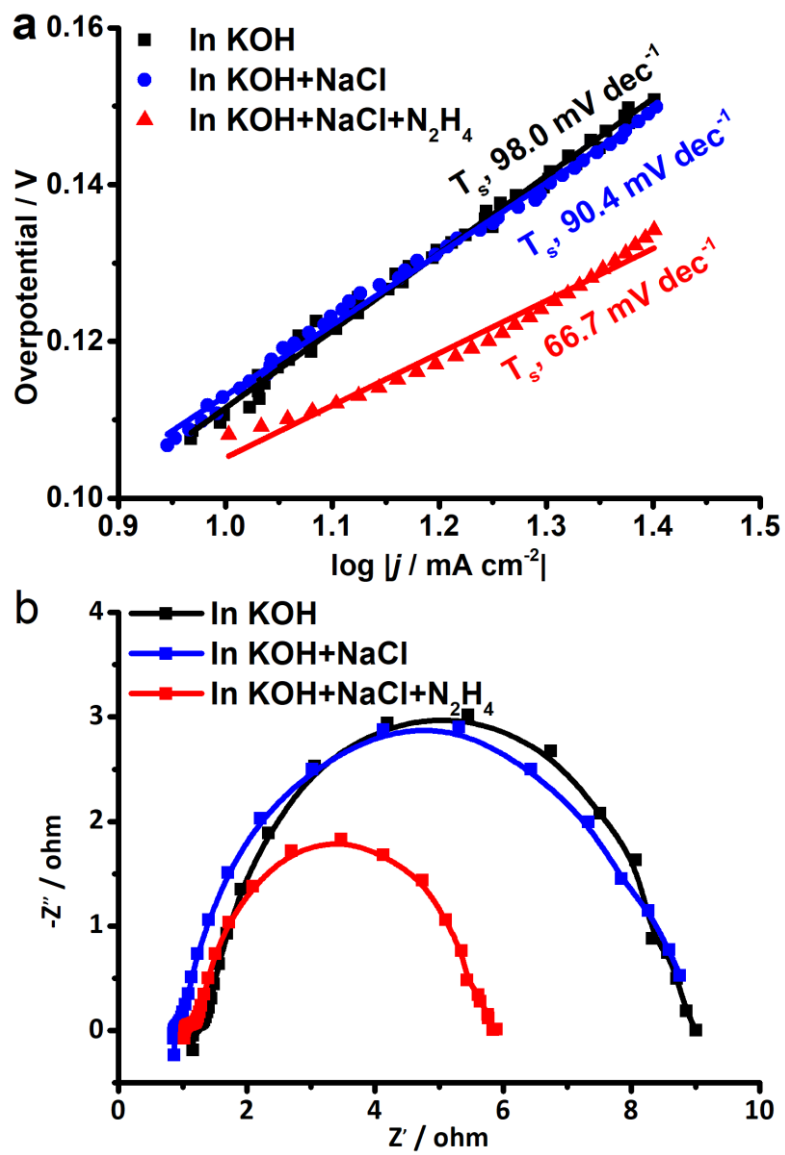

**Fig. S7** (a) Tafel plots and (b) Nyquist plots of the Co-Ni-P/CP electrode measured at  $-0.110$  V vs. RHE toward the HER.

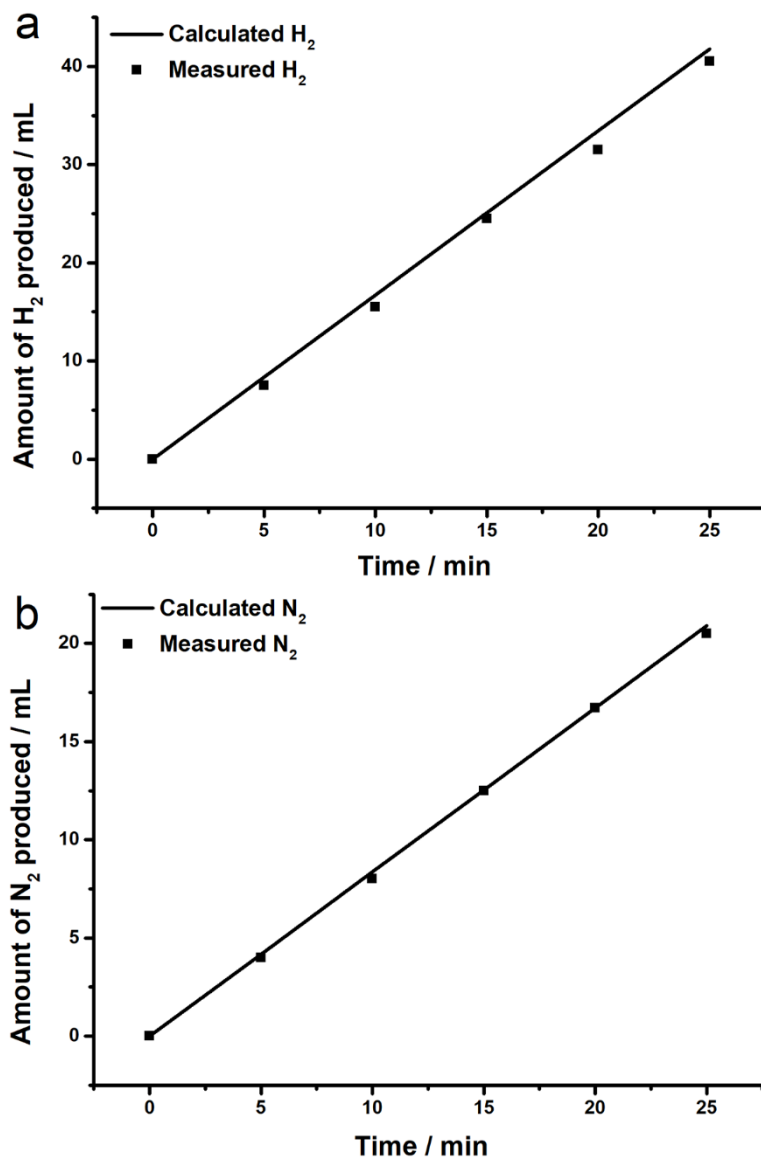

**Fig. S8** The volume of (a) H<sub>2</sub> gas and (b) N<sub>2</sub> gas theoretically evolved (solid line) and experimentally measured (scattered data points) for the HzOR + HER at the current density of 500 mA cm<sup>-2</sup>.

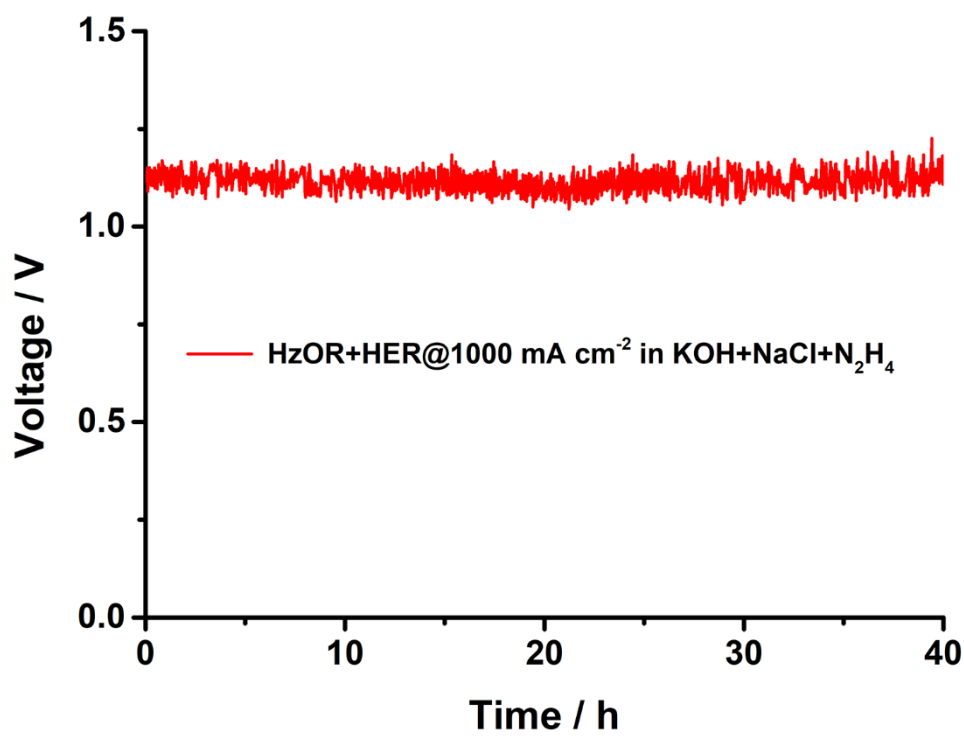

**Fig. S9** Chronopotentiometric curve of the HzOR + HER recorded at a constant current density of  $1000 \text{ mA cm}^{-2}$  in  $1.0 \text{ M KOH} + 0.5 \text{ M NaCl} + 0.1 \text{ M N}_2\text{H}_4$ .

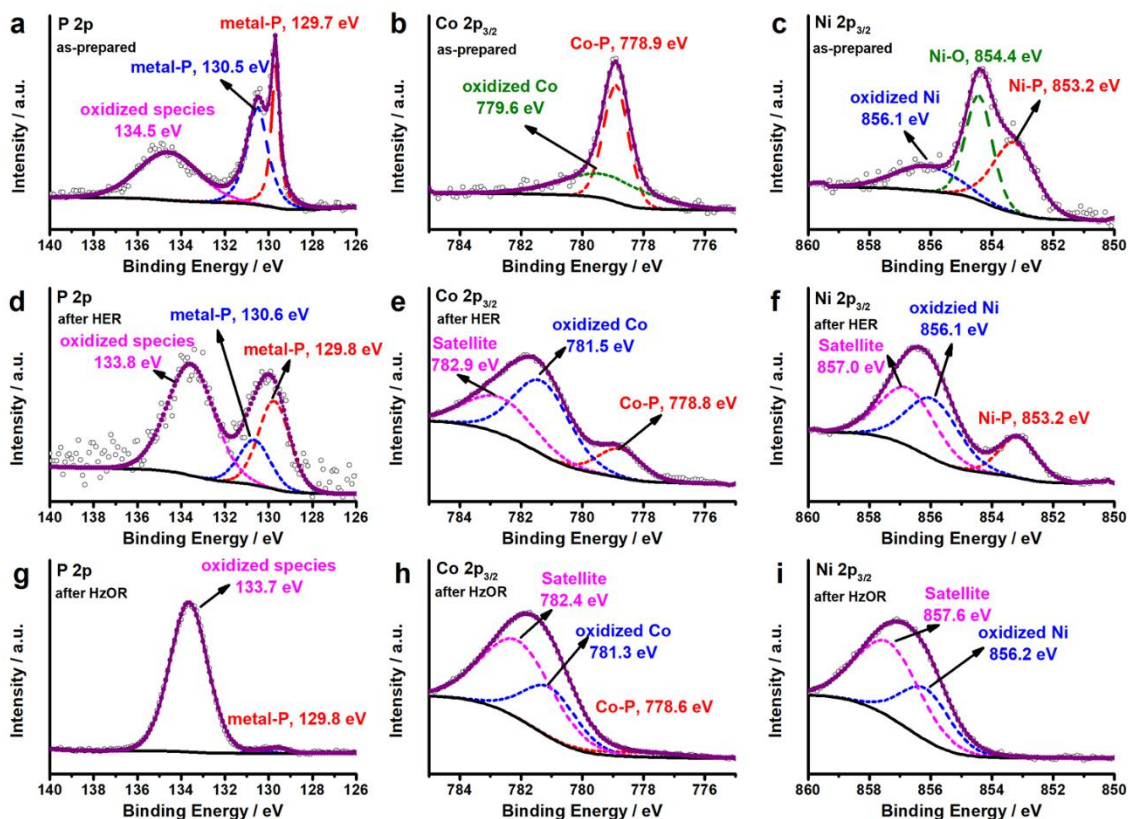

**Fig. S10** High-resolution (a, d, g) P 2p, (b, e, h) Co 2p<sub>3/2</sub>, and (c, f, i) Ni 2p<sub>3/2</sub> XPS spectra of the Co-Ni-P/CP electrode (a-c) before and after the (d-f) HER and (g-i) HzOR at 500 mA cm<sup>-2</sup> for 80 h in 1.0 M KOH + 0.5 M NaCl + 0.1 M N<sub>2</sub>H<sub>4</sub> in the two-electrode configuration.

**Table S1.** The comparison of hydrazine electrolysis performance for the Co-Ni-P/CP electrode reported in this work with that of electrocatalysts/catalytic electrodes recently reported in the literature.

| Catalysts                          | Electrolyte                                                | Cell voltage (V) | j (mA cm <sup>-2</sup> ) | Stability                     | Reference                                                           |
|------------------------------------|------------------------------------------------------------|------------------|--------------------------|-------------------------------|---------------------------------------------------------------------|
| Co-Ni-P/CP                         | 1 M KOH + 0.5 M NaCl + 0.1 M N <sub>2</sub> H <sub>4</sub> | 0.216            | 100                      | 500 mA cm <sup>-2</sup>       | This work                                                           |
|                                    |                                                            | 0.533            | 500                      | <sup>2</sup> @80 h, 1000      |                                                                     |
|                                    |                                                            | 1.116            | 1000                     | mA cm <sup>-2</sup> @40 h     |                                                                     |
| NiCo-MoNi <sub>4</sub>             | 1 M KOH+ 0.1 M N <sub>2</sub> H <sub>4</sub>               | 0.315            | 100                      | 0.1 V for 10 h                | <i>Chem. Eng. J.</i> , 2021, <b>414</b> , 128818.                   |
| Cu <sub>1</sub> Ni <sub>2</sub> -N | 1 M KOH + 0.5 M N <sub>2</sub> H <sub>4</sub>              | 0.24             | 10                       | 10 mA cm <sup>-2</sup> @75 h  | <i>Adv. Energy Mater.</i> , 2019, <b>9</b> , 1900390.               |
| CoSe <sub>2</sub>                  | 1 M KOH + 0.5 M N <sub>2</sub> H <sub>4</sub>              | 0.164            | 10                       | 10 mA cm <sup>-2</sup> @14 h  | <i>Angew. Chem. Int. Ed.</i> , 2018, <b>57</b> , 7649-7653.         |
| CoP                                | 1 M KOH + 0.1 M N <sub>2</sub> H <sub>4</sub>              | 0.2              | 10                       | 0.1 V for 20 h                | <i>ChemElectroChem</i> , 2017, <b>4</b> , 481-484.                  |
| CoS <sub>2</sub>                   | 1 M KOH + 0.1 M N <sub>2</sub> H <sub>4</sub>              | 0.81             | 100                      | 25 mA cm <sup>-2</sup> @5.6 h | <i>New J. Chem.</i> , 2017, <b>41</b> , 4754-4757.                  |
| Ni(Cu)                             | 1 M KOH + 0.5 M N <sub>2</sub> H <sub>4</sub>              | 0.41             | 100                      | 100 mA cm <sup>-2</sup> @10 h | <i>ACS Sustain. Chem. Eng.</i> , 2018, <b>6</b> , 12746-12754.      |
| Cu <sub>3</sub> P                  | 1 M KOH + 0.5 M N <sub>2</sub> H <sub>4</sub>              | 0.72             | 100                      | 10 mA cm <sup>-2</sup> @3 h   | <i>Inorg. Chem. Front.</i> , 2017, <b>4</b> , 420-423.              |
| CoSe                               | 1 M KOH + 0.5 M N <sub>2</sub> H <sub>4</sub>              | 0.5              | 50                       | 40 mA cm <sup>-2</sup> @10 h  | <i>J. Power Sources</i> , 2018, <b>401</b> , 238-244.               |
| Ni <sub>3</sub> S <sub>2</sub>     | 1 M KOH + 0.2 M N <sub>2</sub> H <sub>4</sub>              | 0.867            | 100                      | 20 mA cm <sup>-2</sup> @11 h  | <i>J. Mater. Chem. A</i> , 2018, <b>6</b> , 19201-19209.            |
| Rh-C-N                             | 1 M KOH + 0.5 M N <sub>2</sub> H <sub>4</sub>              | 0.2              | 20                       | 20 mA cm <sup>-2</sup> @3 h   | <i>ACS Appl. Mater. Interfaces</i> , 2019, <b>11</b> , 35039-35049. |

## References

1. I. Amorim, J. Xu, N. Zhang, D. Xiong, S. M. Thalluri, R. Thomas, J. P. S. Sousa, A. Araújo, H. Li and L. Liu, *Catal. Today*, 2020, **358**, 196-202.
